# Supplementary material for: Dads at Mealtimes: Associations between Food Security, Household and Work Chaos, and Paternal Feeding Practices among Australian Fathers Living with Disadvantage
Source: MDPI journal article supplement (doi:10.3390/nu16020205), 2024-01-08
Supplement: s1 [file s1]

## Supplementary Materials: Supplementary Tables S1-S5

**Table S1.** Item statistic for 18-item HFSSM reported in a sample of 222 participants.

| <b>Response of HFSSM individual item<br/>(n = 222)</b>       | <b>Affirmative responses<sup>a</sup><br/>N (%)</b> | <b>Negatives responses<sup>a</sup><br/>N (%)</b> |
|--------------------------------------------------------------|----------------------------------------------------|--------------------------------------------------|
| <b>Adult items</b>                                           |                                                    |                                                  |
| Worried food would run out                                   | 171 (77)                                           | 51 (23)                                          |
| Food bought just didn't last                                 | 141 (64)                                           | 81 (37)                                          |
| Couldn't afford to eat balanced meals                        | 155 (70)                                           | 67 (30)                                          |
| Adult cut size of meals or skipped meals                     | 132 (60)                                           | 90 (41)                                          |
| Adult ate less than felt they should                         | 144 (65)                                           | 78 (35)                                          |
| Adult cut size of meals or skipped meals in 3 or more months | 102 (46)                                           | 120 (54)                                         |
| Adult hungry buy didn't eat                                  | 118 (53)                                           | 104 (47)                                         |
| Respondent lost weight                                       | 69 (31)                                            | 153 (69)                                         |
| Adult did not eat for the whole day                          | 43 (19)                                            | 179 (81)                                         |
| Adult did not eat for whole day in 3 or more months          | 29 (13)                                            | 193 (87)                                         |
| <b>Child items</b>                                           |                                                    |                                                  |
| Relied on few kinds of low-cost food for children            | 156 (70)                                           | 66 (30)                                          |
| Couldn't feed the children a balanced meal                   | 108 (49)                                           | 114 (51)                                         |
| Children were not eating enough                              | 35 (16)                                            | 187 (84)                                         |
| Cut size of children's meals                                 | 9 (4)                                              | 213 (96)                                         |
| Children were hungry                                         | 12 (5)                                             | 210 (95)                                         |
| Children skipped meals                                       | 5 (2)                                              | 217 (98)                                         |
| Children skipped meals in 3 or more months                   | 4 (2)                                              | 218 (98)                                         |
| Children did not eat for whole day                           | 6 (3)                                              | 216 (97)                                         |

<sup>a</sup> Affirmative responses were 'sometimes' or 'often true'; 'yes' or 'almost every month or some months'; negative responses were 'never true'; 'no' or 'only 1 or 2 months'.

**Table S2.** Food security status assessed by HFSSM in binary and categorical form, and NHS single item in a sample of 222 participants, and separately for young and older child groups.

|                                     | <b>Total<br/>(n =222)</b> | <b>Younger child<br/>group [&lt;2 years]<br/>(n =88)</b> | <b>Older child group<br/>[2 - 5 years]<br/>(n = 134)</b> |
|-------------------------------------|---------------------------|----------------------------------------------------------|----------------------------------------------------------|
| <b>Australian NHS-1 item, n (%)</b> |                           |                                                          |                                                          |
| Food secure                         | 141 (64)                  | 61 (58)                                                  | 80 (50)                                                  |
| Food insecure                       | 81 (37)                   | 27 (26)                                                  | 54 (34)                                                  |
| <b>HFSSM, n (%)</b>                 |                           |                                                          |                                                          |
| Food secure                         | 52 (23)                   | 21 (24)                                                  | 31 (23)                                                  |
| - High food security                | 22 (10)                   | 9 (9)                                                    | 13 (8)                                                   |
| - Marginal food security            | 30 (14)                   | 12 (11)                                                  | 18 (11)                                                  |
| Food insecure                       | 170 (77)                  | 67 (76)                                                  | 103 (77)                                                 |
| - Low food security                 | 72 (32)                   | 30 (29)                                                  | 42 (26)                                                  |
| - Very low food security            | 98 (44)                   | 37 (35)                                                  | 61 (38)                                                  |

NHS, National Health Survey; HFSSM, Household Food Security Survey Module.

**Table S3.** Means, standard deviation and internal reliability of feeding practices for the separate younger and older child groups.

|                                                           | <b>M±SD</b> | <b>Cronbach's <math>\alpha</math></b> | <b>Missing data (%)</b> |
|-----------------------------------------------------------|-------------|---------------------------------------|-------------------------|
| <b>Younger child group [&lt;2 years] (n =105)</b>         |             |                                       |                         |
| <b>- FPSQ-S</b>                                           |             |                                       |                         |
| Feeding on demand <sup>a, d</sup> (4 items)               | 3.5±0.6     | 0.55                                  | 11 (11)                 |
| Foods to calm <sup>b</sup> (6 items)                      | 2.3±0.8     | 0.88                                  | 12 (11)                 |
| Persuasive feeding <sup>b</sup> (7 items)                 | 2.8±0.9     | 0.86                                  | 11 (11)                 |
| Parent-led feeding <sup>b</sup> (4 items)                 | 2.3±0.8     | 0.75                                  | 11 (11)                 |
| Family meal environment <sup>a</sup> (4 items)            | 3.9±0.9     | 0.75                                  | 53 <sup>e</sup> (51)    |
| Using(non-) food rewards <sup>b</sup> (9 items)           | 1.9±0.9     | 0.94                                  | 55 <sup>e</sup> (52)    |
| <b>Older child group [2 -5 years] (n =159)</b>            |             |                                       |                         |
| <b>- FPSQ-28</b>                                          |             |                                       |                         |
| Reward for behaviour <sup>b</sup> (4 items)               | 2.7±0.8     | 0.78                                  | 14 (9)                  |
| Reward for eating <sup>b</sup> (4 items)                  | 2.5±0.9     | 0.86                                  | 14 (9)                  |
| Persuasive feeding <sup>b</sup> (6 items)                 | 3.4±0.6     | 0.70                                  | 14 (9)                  |
| Covert restriction <sup>a</sup> (4 items)                 | 2.8±0.9     | 0.82                                  | 15 (9)                  |
| Structured meal setting <sup>a</sup> (3 items)            | 3.7±0.9     | 0.81                                  | 15 (9)                  |
| Structured meal timing <sup>a</sup> (3 items)             | 3.4±0.6     | 0.39                                  | 15 (9)                  |
| Overt restriction <sup>b</sup> (4 items)                  | 3.7±0.9     | 0.68                                  | 23 (15)                 |
| <b>- FPI</b>                                              |             |                                       |                         |
| Offer new foods <sup>c</sup> (3 items)                    | 3.7±0.6     | 0.83                                  | 24 (15)                 |
| Encourage exploration of new foods <sup>c</sup> (3 items) | 3.9±0.9     | 0.90                                  | 24 (15)                 |
| Urge child to eat new foods <sup>c</sup> (4 items)        | 3.6±0.6     | 0.58                                  | 25 (16)                 |
| Repeated presentation of new foods <sup>c</sup> (3 items) | 3.4±0.8     | 0.69                                  | 25 (16)                 |

M±SD, Mean ± standard deviation; FPSQ-S/28, Feeding Practices and Structure

Questionnaire; FPI, Food Parenting Inventory

<sup>a</sup> Construct related to structure

<sup>b</sup> Construct related to coercive control

<sup>c</sup> Construct related to autonomy support

<sup>d</sup> Higher feeding on demand score indicated more adherence to feeding routine.

<sup>e</sup> This was due to these constructs applying to fathers with children aged one year or above (n =56). True missing values were four to six (7-11%) for these constructs.

**Table S4.** Count and proportion for family meal setting, and bivariate analyses with food security status, household and work chaos for older child group.

| Older child group<br>[2 – 5 years] |           | Total<br>count<br>n=134 | HFSSM food security <sup>a</sup> |                        | CHAOS<br>score <sup>b</sup><br>n =133 | Work chaos<br>score <sup>b</sup><br>n =133 |
|------------------------------------|-----------|-------------------------|----------------------------------|------------------------|---------------------------------------|--------------------------------------------|
|                                    |           |                         | Food secure<br>n=31              | Food insecure<br>n=103 |                                       |                                            |
|                                    |           | n (%)                   |                                  |                        | M±SD                                  |                                            |
| Family<br>meal<br>setting          | Never     | 5 (4)                   | 0                                | 5 (5)                  | 17.80±3.90                            | 1.20±1.30                                  |
|                                    | Rarely    | 9 (7)                   | 2 (7)                            | 7 (7)                  | 18.56±4.25                            | 1.56±1.74                                  |
|                                    | Sometimes | 23 (17)                 | 6 (19)                           | 17 (17)                | 16.26±3.97                            | 1.04±1.07                                  |
|                                    | Often     | 54 (40)                 | 11 (36)                          | 43 (42)                | 16.76±4.43                            | 1.06±1.27                                  |
|                                    | Always    | 43 (32)                 | 12 (39)                          | 31 (30)                | 15.14±4.77                            | 1.48±1.33                                  |
|                                    |           |                         | p = 0.755                        |                        | p =0.183                              | p =0.471                                   |

HFSSM, Household Food Security Survey Module; CHAOS, Confusion, Hubbub, and Order Scale

<sup>a</sup> Fisher's Exact test was used to test for household food security status

<sup>b</sup> One-way ANOVA was used to test for CHAOS and work chaos scores

**Table S5.** Regression models examining individual effects and combining effects of food security, household and work chaos on paternal feeding practices for younger and older child groups.

|                                                |                    |                 | Regression Models              |             |                                              |             |                                 |             |                                              |             |                                             |             |
|------------------------------------------------|--------------------|-----------------|--------------------------------|-------------|----------------------------------------------|-------------|---------------------------------|-------------|----------------------------------------------|-------------|---------------------------------------------|-------------|
|                                                |                    |                 | 1                              |             | 2                                            |             | 3                               |             | 4                                            |             | 5                                           |             |
| Feeding practices                              |                    | IV              | B<br>(95% CI)                  | p-<br>value | B<br>(95% CI)                                | p-<br>value | B<br>(95% CI)                   | p-<br>value | B<br>(95% CI)                                | p-<br>value | B<br>(95% CI)                               | p-<br>value |
| Younger child group [ $<2$ years] <sup>a</sup> |                    |                 |                                |             |                                              |             |                                 |             |                                              |             |                                             |             |
| Coercive control                               | Using food to calm | FI <sup>b</sup> | 0.291<br>(-0.109, 0.691)       | 0.152       | -                                            | -           | -                               | -           | 0.208<br>(-0.175, 0.592)                     | 0.284       | 0.213<br>(-0.174, 0.601)                    | 0.277       |
|                                                |                    | HC              | -                              | -           | 0.067 (0.003, 0.104)                         | $<0.001$    | -                               | -           | 0.066<br>(0.029, 0.103)                      | $<0.001$    | 0.069<br>(0.031, 0.108)                     | $<0.001$    |
|                                                |                    | WC              | -                              | -           | -                                            | -           | -0.057<br>(-0.193, 0.078)       | 0.404       | -                                            | -           | -0.086<br>(-0.018, 0.073)                   | 0.403       |
|                                                |                    |                 | R <sup>2</sup> : 0.013 (n=87)  |             | R <sup>2</sup> : 0.124 <sup>***</sup> (n=86) |             | R <sup>2</sup> : -0.004 (n= 84) |             | R <sup>2</sup> : 0.126 <sup>***</sup> (n=86) |             | R <sup>2</sup> : 0.132 <sup>**</sup> (n=84) |             |
|                                                | Persuasive feeding | FI <sup>b</sup> | 0.530<br>(0.091, 0.969)        | 0.019       | -                                            | -           | -                               | -           | 0.514<br>(0.083, 0.944)                      | 0.02        | 0.511<br>(0.072, 0.95)                      | 0.023       |
|                                                |                    | HC              | -                              | -           | 0.065 (0.022, 0.107)                         | 0.003       | -                               | -           | 0.062<br>(0.02, 0.103)                       | 0.004       | 0.063 (0.02, 0.106)                         | 0.005       |
|                                                |                    | WC              | -                              | -           | -                                            | -           | -0.054<br>(-0.206, 0.099)       | 0.487       | -                                            | -           | -0.049<br>(-0.191, 0.094)                   | 0.498       |
|                                                |                    |                 | R <sup>2</sup> : 0.052* (n=88) |             | R <sup>2</sup> : 0.087 <sup>**</sup> (n=87)  |             | R <sup>2</sup> : -0.006 (n=85)  |             | R <sup>2</sup> : 0.134 <sup>***</sup> (n=87) |             | R <sup>2</sup> : 0.126 <sup>**</sup> (n=85) |             |
|                                                | Parent-led feeding | FI <sup>b</sup> | 0.275<br>(-0.128, 0.678)       | 0.178       | -                                            | -           | -                               | -           | 0.296<br>(-0.117, 0.708)                     | 0.157       | 0.313<br>(-0.103, 0.729)                    | 0.139       |
|                                                |                    | HC              | -                              | -           | 0.021                                        | 0.293       | -                               | -           | 0.019                                        | 0.332       | 0.021                                       | 0.317       |

|                                              |                         |                                |                                |                               |                                  |                                |                                |                               |                                  |                               |                                  |       |
|----------------------------------------------|-------------------------|--------------------------------|--------------------------------|-------------------------------|----------------------------------|--------------------------------|--------------------------------|-------------------------------|----------------------------------|-------------------------------|----------------------------------|-------|
| Structure                                    | Family meal environment |                                |                                |                               | (-0.019, 0.061)                  |                                |                                |                               | (-0.02, 0.059)                   |                               | (0.02, 0.061)                    |       |
|                                              |                         | WC                             | -                              | -                             | -                                | -                              | -0.007 (-0.143, 0.129)         | 0.919                         | -                                | -                             | -0.004 (-0.139, 0.131)           | 0.952 |
|                                              |                         |                                | R <sup>2</sup> : 0.01(n=88)    |                               | R <sup>2</sup> : 0.001(n=87)     |                                | R <sup>2</sup> : -0.012 (n=86) |                               | R <sup>2</sup> : 0.013 (n=87)    |                               | R <sup>2</sup> : 0.005 (n=86)    |       |
|                                              |                         | FI <sup>b</sup>                | -0.025 (-0.59, 0.539)          | 0.928                         | -                                | -                              | -                              | -                             | 0.002 (-0.558, 0.562)            | 0.994                         | 0.016 (-0.555, 0.587)            | 0.955 |
|                                              |                         | HC                             | -                              | -                             | -0.039 (-0.094, 0.015)           | 0.153                          | -                              | -                             | -0.039 (-0.094, 0.016)           | 0.158                         | -0.036 (-0.094, 0.022)           | 0.218 |
|                                              | WC                      | -                              | -                              | -                             | -                                | -0.052 (-0.231, 0.127)         | 0.561                          | -                             | -                                | -0.053 (-0.233, 0.127)        | 0.555                            |       |
|                                              |                         | R <sup>2</sup> : -0.021 (n=49) |                                | R <sup>2</sup> : 0.023 (n=49) |                                  | R <sup>2</sup> : -0.014 (n=48) |                                | R <sup>2</sup> : 0.001 (n=49) |                                  | R <sup>2</sup> : -0.024(n=48) |                                  |       |
| Older child group [2 – 5 years] <sup>a</sup> |                         |                                |                                |                               |                                  |                                |                                |                               |                                  |                               |                                  |       |
| Coercive control                             | Reward for behaviour    | FI <sup>b</sup>                | 0.328 (-0.003, 0.660)          | 0.021                         | -                                | -                              | -                              | -                             | 0.178 (-0.156, 0.512)            | 0.294                         | 0.168 (-0.166, 0.501)            | 0.322 |
|                                              |                         | HC                             | -                              | -                             | 0.046 (0.016, 0.077)             | 0.003                          | -                              | -                             | 0.042 (0.011, 0.074)             | 0.008                         | 0.039 (0.008, 0.071)             | 0.015 |
|                                              |                         | WC                             | -                              | -                             | -                                | -                              | 0.096 (-0.012, 0.204)          | 0.082                         | -                                | -                             | 0.07 (-0.037, 0.177)             | 0.2   |
|                                              |                         |                                | R <sup>2</sup> : 0.021 (n=134) |                               | R <sup>2</sup> : 0.057** (n=133) |                                | R <sup>2</sup> : 0.015 (n=133) |                               | R <sup>2</sup> : 0.058** (n=133) |                               | R <sup>2</sup> : 0.062** (n=133) |       |
|                                              | Reward for eating       | FI <sup>b</sup>                | 0.145 (-0.236, 0.525)          | 0.453                         | -                                | -                              | -                              | -                             | 0.034 (-0.358, 0.426)            | 0.865                         | 0.032 (-0.036, 0.426)            | 0.871 |
|                                              |                         | HC                             | -                              | -                             | 0.037 (0.002, 0.073)             | 0.041                          | -                              | -                             | 0.038 (0.000, 0.073)             | 0.051                         | 0.036 (-0.001, 0.073)            | 0.057 |
|                                              |                         | WC                             | -                              | -                             | -                                | -                              | 0.030 (-0.096, 0.156)          | 0.637                         | -                                | -                             | 0.009 (-0.0117, 0.136)           | 0.883 |

|           |                    |                         |                                 |                              |                                 |       |                                  |       |                                 |       |                                 |       |
|-----------|--------------------|-------------------------|---------------------------------|------------------------------|---------------------------------|-------|----------------------------------|-------|---------------------------------|-------|---------------------------------|-------|
| Structure | Persuasive feeding |                         | R <sup>2</sup> : -0.003 (n=134) |                              | R <sup>2</sup> : 0.024* (n=133) |       | R <sup>2</sup> : -0.006 (n=133)  |       | R <sup>2</sup> : 0.017 (n=133)  |       | R <sup>2</sup> : 0.009 (n=133)  |       |
|           |                    | FI <sup>b</sup>         | 0.260<br>(0.015,<br>0.505)      | 0.038                        | -                               | -     | -                                | -     | 0.245<br>(-0.011,<br>0.501)     | 0.06  | 0.240<br>(-0.016,<br>0.497)     | 0.066 |
|           |                    | HC                      | -                               | -                            | 0.014<br>(-0.01,<br>0.038)      | 0.244 | -                                | -     | 0.009<br>(-0.015,<br>0.033)     | 0.469 | 0.007<br>(-0.017,<br>0.032)     | 0.545 |
|           |                    | WC                      | -                               | -                            | -                               | -     | 0.042<br>(-0.04,<br>0.124)       | 0.31  | -                               | -     | 0.032<br>(-0.031,<br>0.114)     | 0.445 |
|           |                    |                         | R <sup>2</sup> : 0.025* (n=134) |                              | R <sup>2</sup> : 0.003 (n=133)  |       | R <sup>2</sup> : 0.000 (n=133)   |       | R <sup>2</sup> : 0.022 (n=133)  |       | R <sup>2</sup> : 0.019 (n=133)  |       |
|           | Overt restriction  | FI <sup>b</sup>         | 0.043<br>(-0.312,<br>0.399)     | 0.810                        | -                               | -     | -                                | -     | -0.121<br>(-0.478,<br>0.235)    | 0.503 | -0.129<br>(-0.486,<br>0.228)    | 0.477 |
|           |                    | HC                      | -                               | -                            | 0.036 (0.004,<br>0.069)         | 0.029 | -                                | -     | 0.039 (0.005,<br>0.072)         | 0.023 | 0.037 (0.003,<br>0.070)         | 0.033 |
|           |                    | WC                      | -                               | -                            | -                               | -     | 0.067<br>(-0.047,<br>0.181)      | 0.249 | -                               | -     | 0.05<br>(-0.065,<br>0.165)      | 0.389 |
|           |                    |                         | R <sup>2</sup> : -0.007 (n=134) |                              | R <sup>2</sup> : 0.029* (n=133) |       | R <sup>2</sup> : 0.003 (n=133)   |       | R <sup>2</sup> : 0.025 (n=133)  |       | R <sup>2</sup> : 0.023 (n=133)  |       |
|           | Covert restriction | FI <sup>b</sup>         | -0.013<br>(-0.376,<br>0.349)    | 0.942                        | -                               | -     | -                                | -     | 0.094<br>(-0.279,<br>0.466)     | 0.62  | 0.095<br>(-0.279,<br>0.470)     | 0.615 |
|           |                    | HC                      | -                               | -                            | -0.02<br>(-0.054,<br>0.014)     | 0.256 | -                                | -     | -0.022<br>(-0.056,<br>0.013)    | 0.224 | -0.021<br>(-0.056,<br>0.014)    | 0.242 |
|           |                    | WC                      | -                               | -                            | -                               | -     | -0.022<br>(-0.014,<br>0.097)     | 0.719 | -                               | -     | -0.013<br>(-0.133,<br>0.108)    | 0.837 |
|           |                    |                         | R <sup>2</sup> : -0.008 (n=134) |                              | R <sup>2</sup> : 0.002 (n=133)  |       | R <sup>2</sup> : -0.007* (n=133) |       | R <sup>2</sup> : -0.003 (n=133) |       | R <sup>2</sup> : -0.011 (n=133) |       |
|           |                    | Structured meal setting | FI <sup>b</sup>                 | -0.210<br>(-0.558,<br>0.139) | 0.236                           | -     | -                                | -     | -0.123<br>(-0.484,<br>0.237)    | 0.5   | -0.123<br>(-0.486,<br>0.239)    | 0.502 |
|           |                    | HC                      | -                               | -                            | -0.023<br>(-0.056,              | 0.165 | -                                | -     | -0.021<br>(-0.054,              | 0.23  | -0.021<br>(-0.055,              | 0.236 |

|                  |                                    |                 |                                 |       |                                  |       |                                 |       |                                 |       |                                 |       |
|------------------|------------------------------------|-----------------|---------------------------------|-------|----------------------------------|-------|---------------------------------|-------|---------------------------------|-------|---------------------------------|-------|
| Autonomy support |                                    |                 |                                 |       | 0.01)                            |       |                                 |       | 0.013)                          |       | 0.014)                          |       |
|                  |                                    | WC              | -                               | -     | -                                | -     | -0.014<br>(-0.129,<br>0.101)    | 0.815 | -                               | -     | 0.001<br>(-0.116,<br>0.117)     | 0.987 |
|                  |                                    |                 | R <sup>2</sup> : 0.003 (n=134)  |       | R <sup>2</sup> : 0.007 (n=133)   |       | R <sup>2</sup> : -0.007 (n=133) |       | R <sup>2</sup> : 0.003 (n=133)  |       | R <sup>2</sup> : -0.005 (n=133) |       |
|                  |                                    | FI <sup>b</sup> | -0.011<br>(-0.366,<br>0.147)    | 0.400 | -                                | -     | -                               | -     | -0.052<br>(-0.316,<br>0.212)    | 0.699 | -0.045<br>(-0.310,<br>0.219)    | 0.735 |
|                  | Offer new foods                    | HC              | -                               | -     | -0.027<br>(-0.051,<br>-0.003)    | 0.025 | -                               | -     | -0.026<br>(-0.051,<br>-0.002)   | 0.037 | -0.025<br>(-0.050,<br>0.000)    | 0.054 |
|                  |                                    | WC              | -                               | -     | -                                | -     | -0.058<br>(-0.142, -<br>0.027)  | 0.178 | -                               | -     | -0.043<br>(-0.128,<br>0.042)    | 0.317 |
|                  |                                    |                 | R <sup>2</sup> : -0.002 (n=134) |       | R <sup>2</sup> : 0.03 (n=133)    |       | R <sup>2</sup> : 0.006 (n=133)  |       | R <sup>2</sup> : 0.024 (n=133)  |       | R <sup>2</sup> : 0.024 (n=133)  |       |
|                  |                                    | FI <sup>b</sup> | -0.131<br>(-0.485,<br>0.224)    | 0.467 | -                                | -     | -                               | -     | -0.088<br>(-0.458,<br>0.282)    | 0.638 | -0.083<br>(-0.454,<br>0.288)    | 0.659 |
|                  | Exploration of new foods           | HC              | -                               | -     | -0.019<br>(-0.053,<br>0.015)     | 0.269 | -                               | -     | -0.017<br>(-0.052,<br>0.018)    | 0.332 | -0.016<br>(-0.051,<br>0.02)     | 0.382 |
|                  |                                    | WC              | -                               | -     | -                                | -     | -0.046<br>(-0.163,<br>0.072)    | 0.442 | -                               | -     | -0.035<br>(-0.154,<br>0.084)    | 0.563 |
|                  |                                    |                 | R <sup>2</sup> : -0.004 (n=134) |       | R <sup>2</sup> : 0.002 (n=133)   |       | R <sup>2</sup> : -0.003 (n=133) |       | R <sup>2</sup> : -0.004 (n=133) |       | R <sup>2</sup> : -0.009 (n=133) |       |
|                  |                                    | FI <sup>b</sup> | -0.194<br>(-0.505,<br>0.116)    | 0.217 | -                                | -     | -                               | -     | -0.074<br>(-0.389,<br>0.241)    | 0.642 | -0.078<br>(-0.394,<br>0.239)    | 0.629 |
|                  | Repeated presentation of new foods | HC              | -                               | -     | -0.041<br>(-0.07,<br>-0.012)     | 0.005 | -                               | -     | -0.04<br>(-0.069,<br>-0.01)     | 0.009 | -0.04 (-0.07,<br>-0.011)        | 0.008 |
|                  |                                    | WC              | -                               | -     | -                                | -     | -0.002<br>(-0.105,<br>0.101)    | 0.972 | -                               | -     | 0.022<br>(-0.079,<br>0.124)     | 0.664 |
|                  |                                    |                 | R <sup>2</sup> : 0.004 (n=134)  |       | R <sup>2</sup> : 0.051** (n=133) |       | R <sup>2</sup> : -0.008 (n=133) |       | R <sup>2</sup> : 0.045* (n=133) |       | R <sup>2</sup> : 0.039* (n=133) |       |
|                  |                                    |                 |                                 |       |                                  |       |                                 |       |                                 |       |                                 |       |



B, Unstandardised coefficients; CI, Confidence Interval; FI, Food insecurity; HC, Household chaos; IV, Independent variable;  $R^2$ , Coefficient of determination; WC, Work chaos

<sup>a</sup> Younger child group completed FPSQ-S; Older child group completed FPSQ-28 and FPI

Coding for categorical variables (where 0 is the reference group):

<sup>b</sup> Dummy coded: food insecure = 1, food secure = 0

\* =  $p < 0.05$ , \*\* =  $p < 0.01$ , \*\*\* =  $p < 0.001$
